# Supplementary material for: Bioengineered Viral Platform for Intramuscular Passive Vaccine Delivery to Human Skeletal Muscle
Source: PubMed Central journal article supplement — Mol Ther Methods Clin Dev. 2018 Jul 24;10:144–55. doi: 10.1016/j.omtm.2018.06.001 (PMC6077147; doi:10.1016/j.omtm.2018.06.001), 2018-07-24
Supplement: mmc1.pdf [file mmc1.pdf]

**OMTM, Volume 10**

## **Supplemental Information**

### **Bioengineered Viral Platform for Intramuscular Passive Vaccine Delivery to Human Skeletal Muscle**

**Nicole K. Paulk, Katja Pekrun, Gregory W. Charville, Katie Maguire-Nguyen, Michael N. Wosczyzna, Jianpeng Xu, Yue Zhang, Leszek Lisowski, Bryan Yoo, Jose G. Vilches-Moure, Gordon K. Lee, Joseph B. Shrager, Thomas A. Rando, and Mark A. Kay**

SUPPLEMENTAL FIGURES:

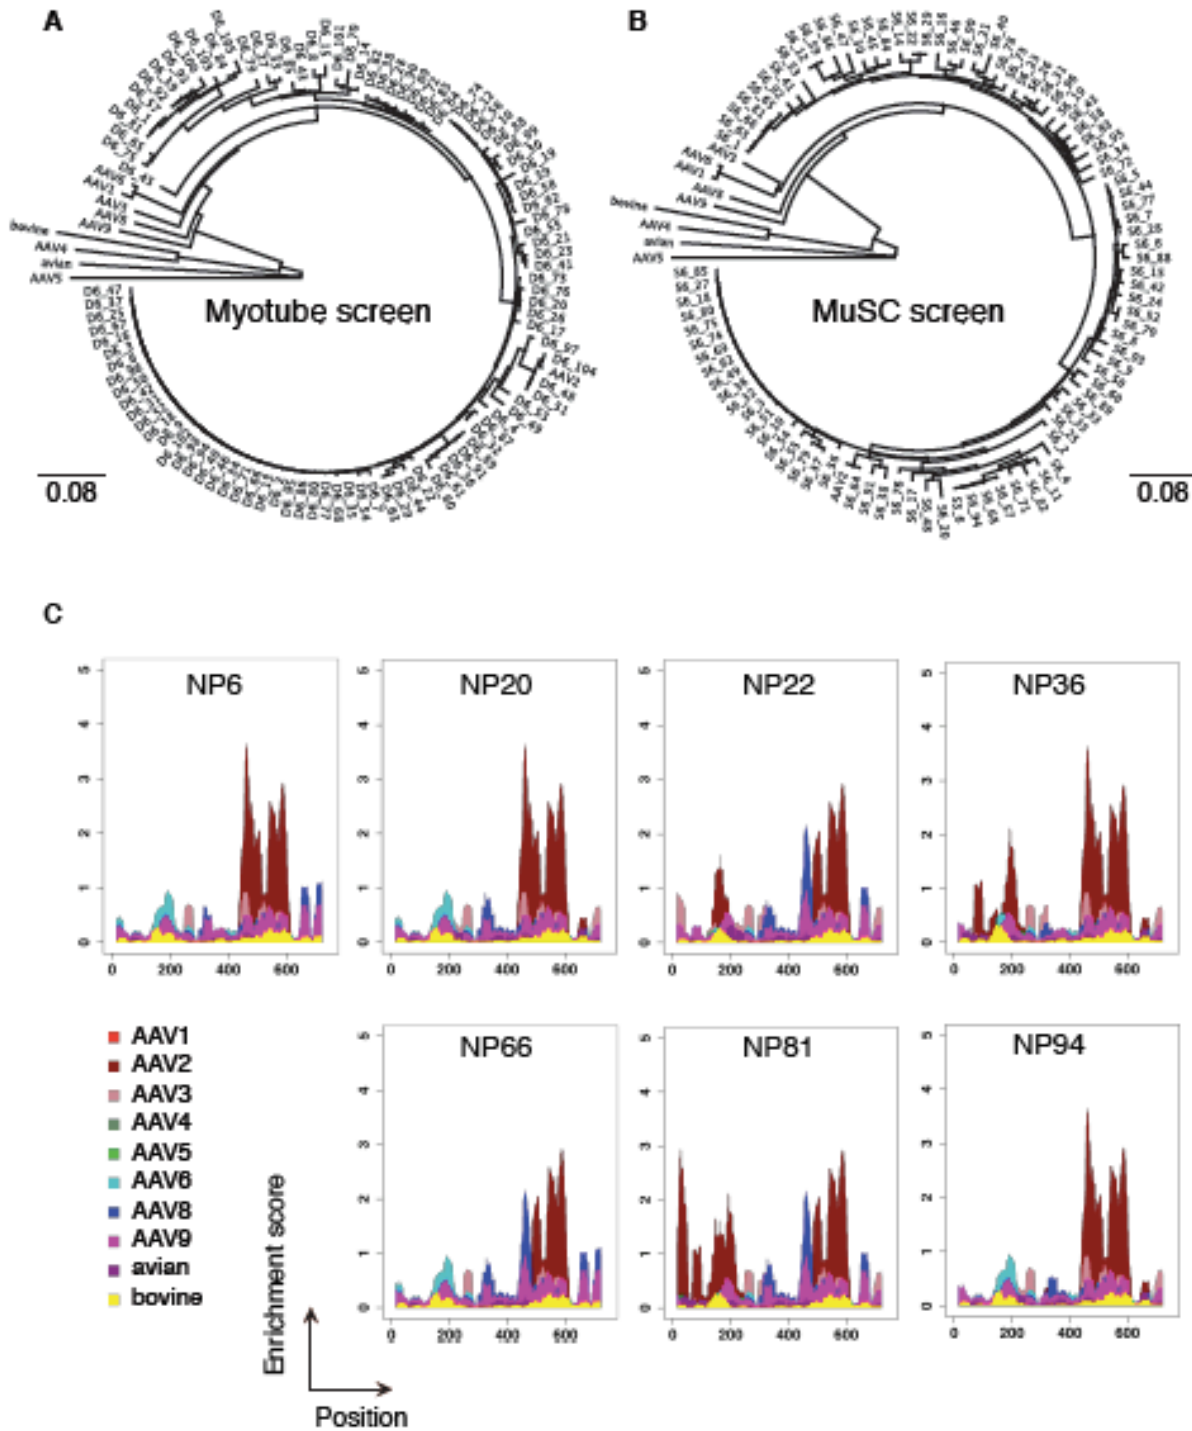

**Figure S1: Phylogeny and enrichment scores of top capsid variants from completion of each screen.**

(A) Phylogenetic tree showing genetic relatedness at the amino acid level among the parental serotypes in the library and the top 100 selected variants from round six of the screen in differentiated human myotubes pooled from five patients. (B) Phylogenetic tree showing genetic relatedness at the amino acid level among the parental serotypes in the library and the top 100 selected variants from round six of the screen in primary human skeletal muscle stem cells pooled from five patients. (C) Enrichment scores were calculated for each amino acid position in the sequence of each chimera by comparison of sequences from parental serotypes based on maximum likelihood. Library parents are depicted in different colors as shown.

**A**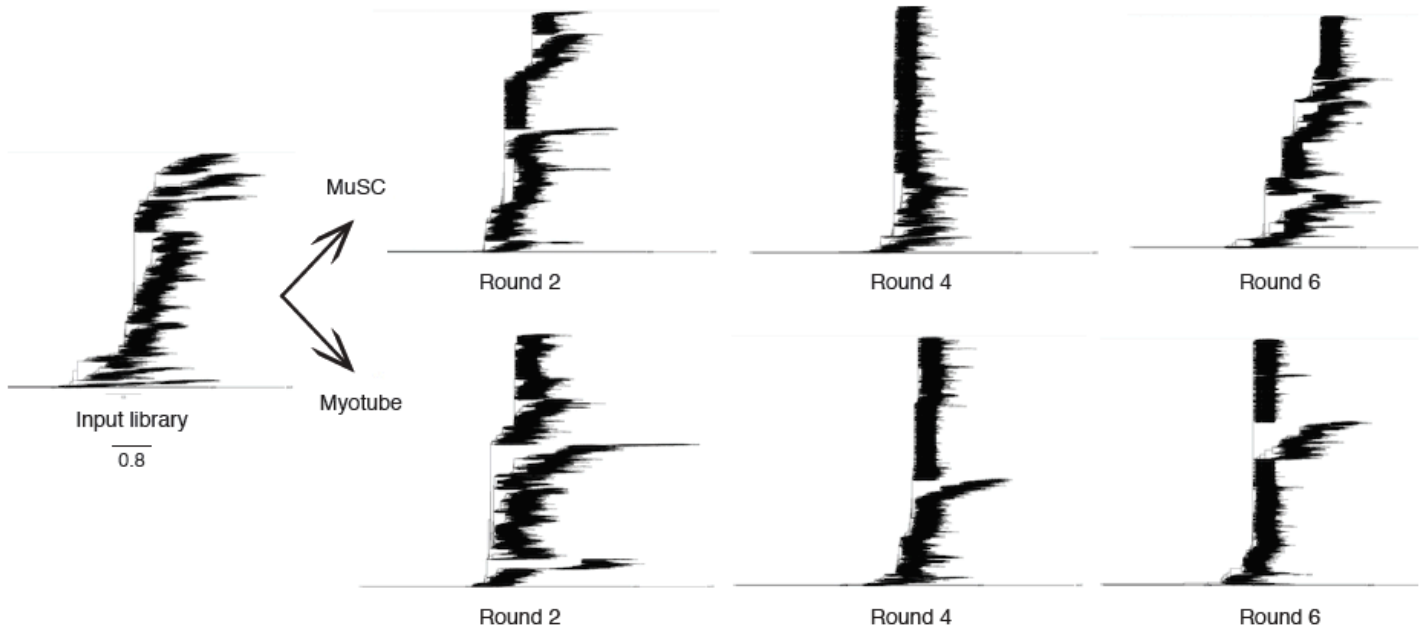

**B**

| Round           | Raw CCS reads | CCS reads post-filtering |
|-----------------|---------------|--------------------------|
| Input library   | 30,910        | 13,845                   |
| Round 2 MuSC    | 6,410         | 3,898                    |
| Round 4 MuSC    | 6,345         | 3,302                    |
| Round 6 MuSC    | 18,369        | 11,085                   |
| Round 2 Myotube | 14,343        | 7,612                    |
| Round 4 Myotube | 10,645        | 6,569                    |
| Round 6 Myotube | 19,542        | 12,724                   |

**Figure S2: Round-by-round phylogenetic trees of all variants by PacBio single molecule sequencing.** (A) Comparative phylogenies showing genetic relatedness at the amino acid level among the parental serotypes in the library and all library variants. The decreasing diversity and increasing enrichment going from the unselected AAV library through rounds 2, 4 and 6 for each screen (human MuSC and myotube) are shown. (B) Raw and filtered CCS read counts used to generate panel (A) are shown.

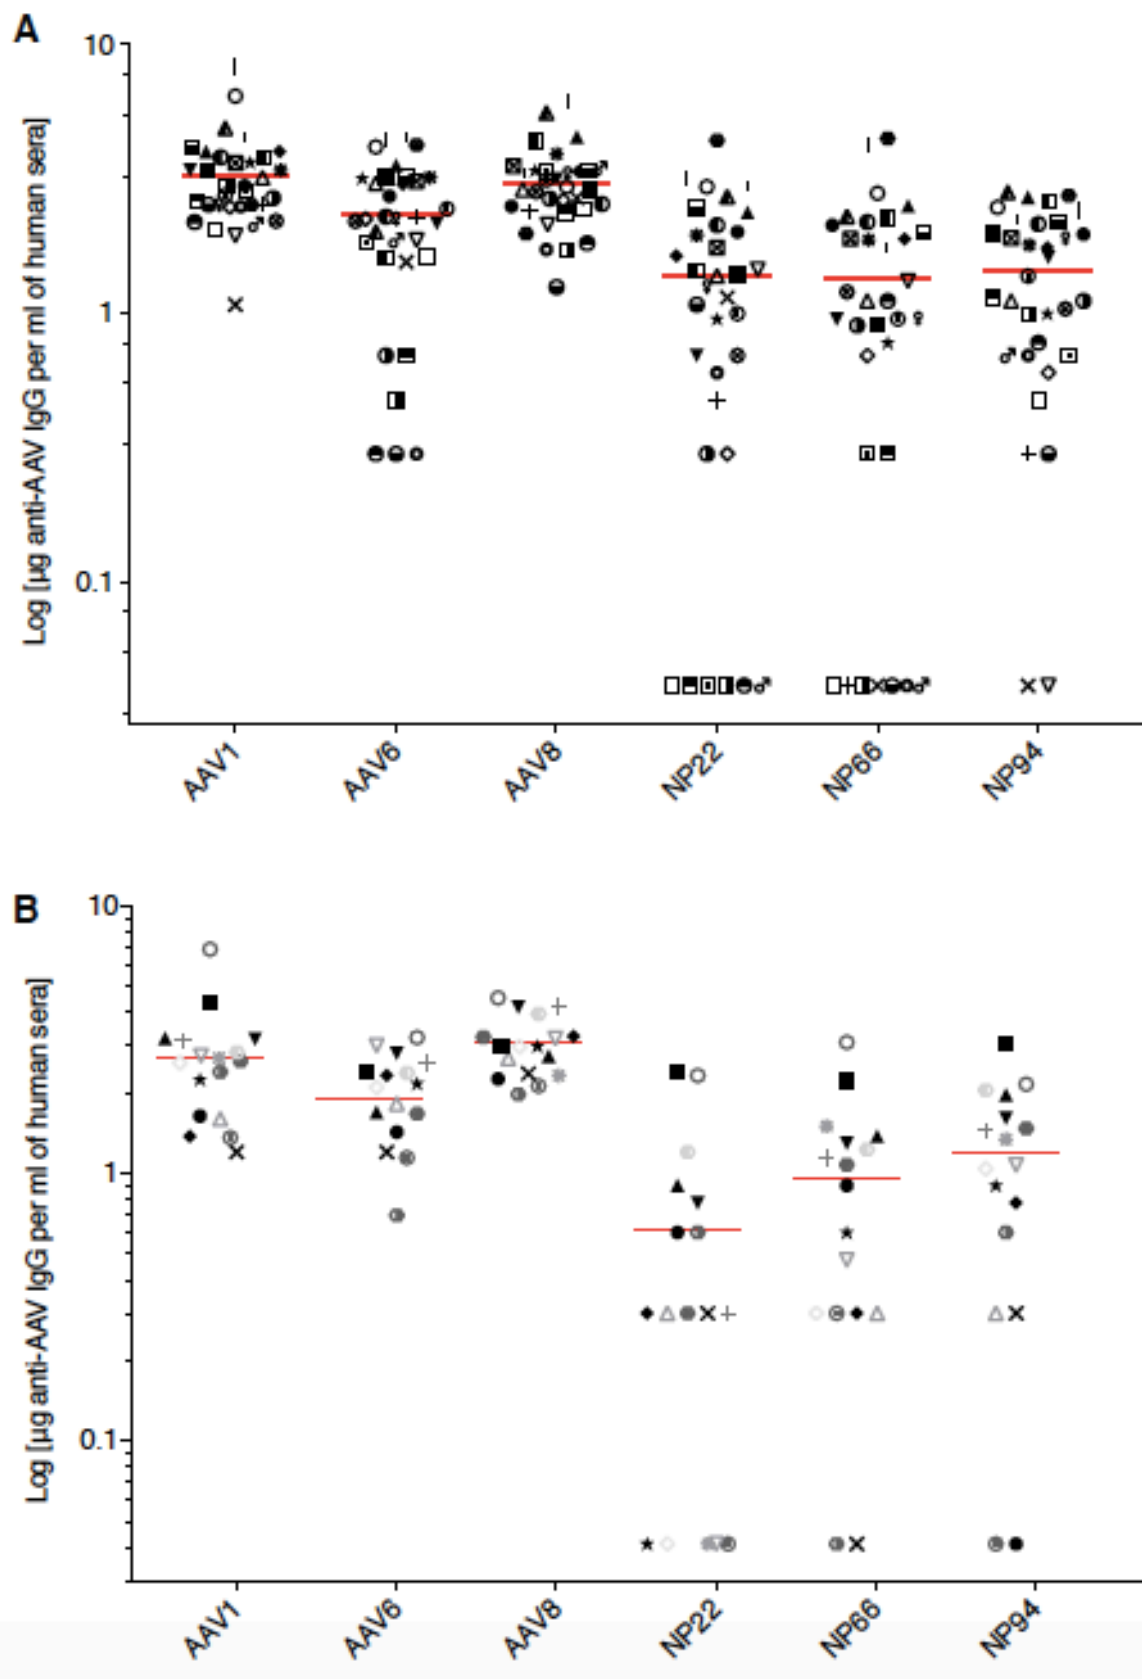

**Figure S3: Seroreactivity profiling by patient sex.**

Seroreactivity ELISA assay for presence of anti-AAV antibodies in normal human serum from 50 US adults. (A) Male patients. (B) Female patients. Each patient was assayed in technical triplicates with data points representing the mean minus background. Symbols are consistent across treatments for each patient to allow comparisons.

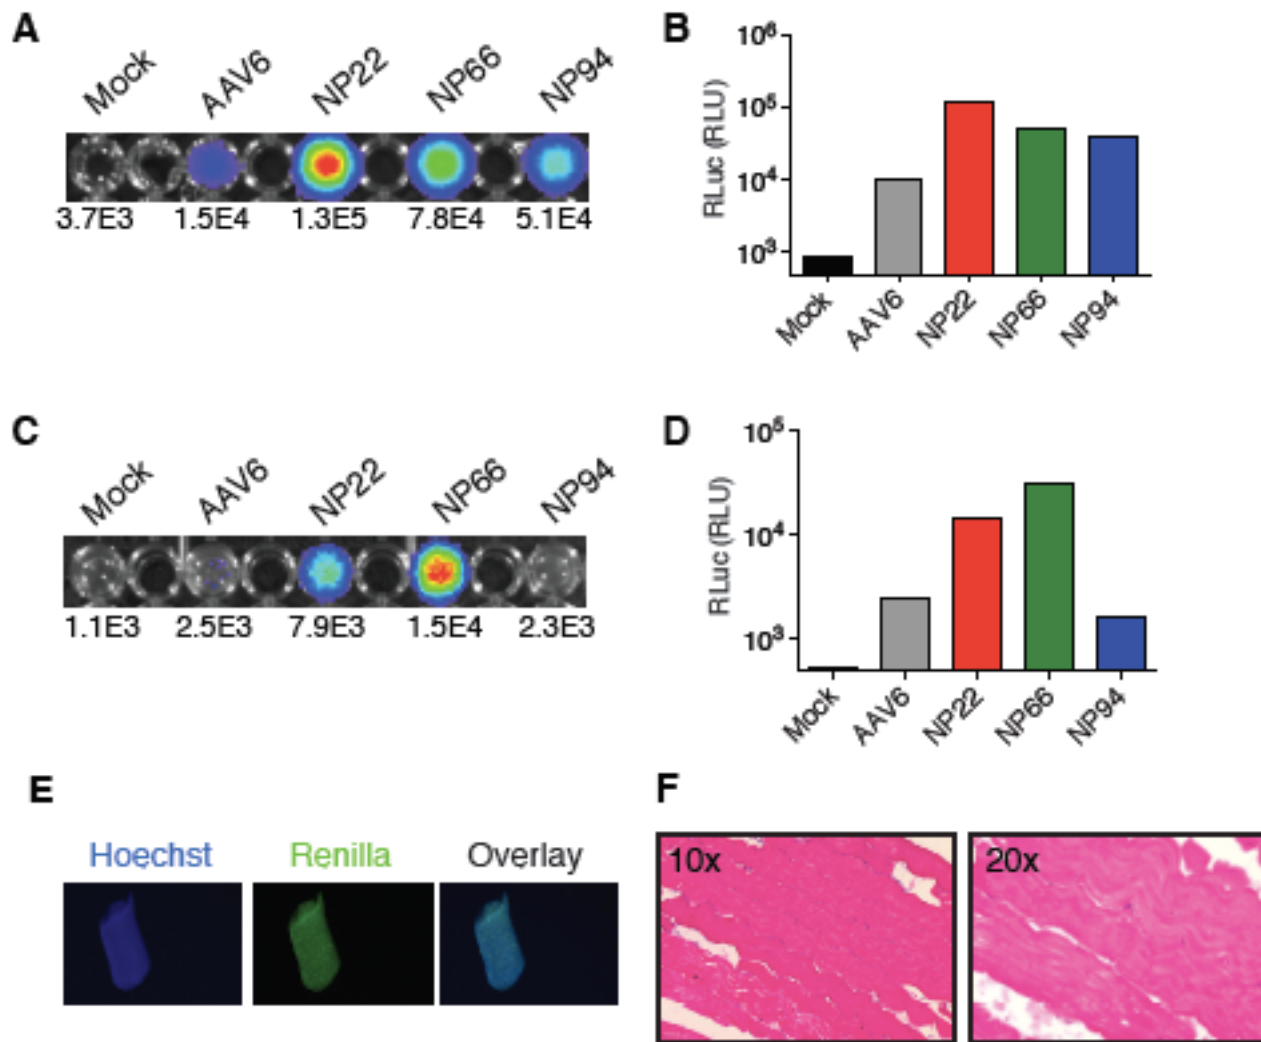

**Figure S4: Additional *ex vivo* data support superior transduction with new shuffled variants.**

(A) RLuc imaging at 48-hrs on 1 replicate (due to small muscle sample size) of human *rectus abdominis* muscle fibers transduced with PBS, rAAV6, NP22 or NP66 expressing scAAV-CAG-RLuc *ex vivo*. Radiance (p/s/cm<sup>2</sup>/sr) displayed below each treatment. (B) RLuc assay on lysed *r. abdominis* fibers at 48-hrs post-transduction. (C) RLuc imaging on 1 replicate (due to small muscle sample size) of human *latissimus dorsi* fibers transduced with PBS, rAAV6, NP22 or NP66 expressing scAAV-CAG-RLuc *ex vivo*. (D) RLuc assay on lysed *l. dorsi* fibers at 48-hrs post-transduction. Radiance displayed below each treatment. (E) Representative staining of transduced single human *l. dorsi* muscle fibers for RLuc (green) and Hoechst (blue) from patient-4 at 40X magnification demonstrating viral uptake along entire fiber length. (F) H&E stains of rhesus *b. femoris* muscle at 10X and 20X magnification demonstrating normal skeletal muscle architecture.

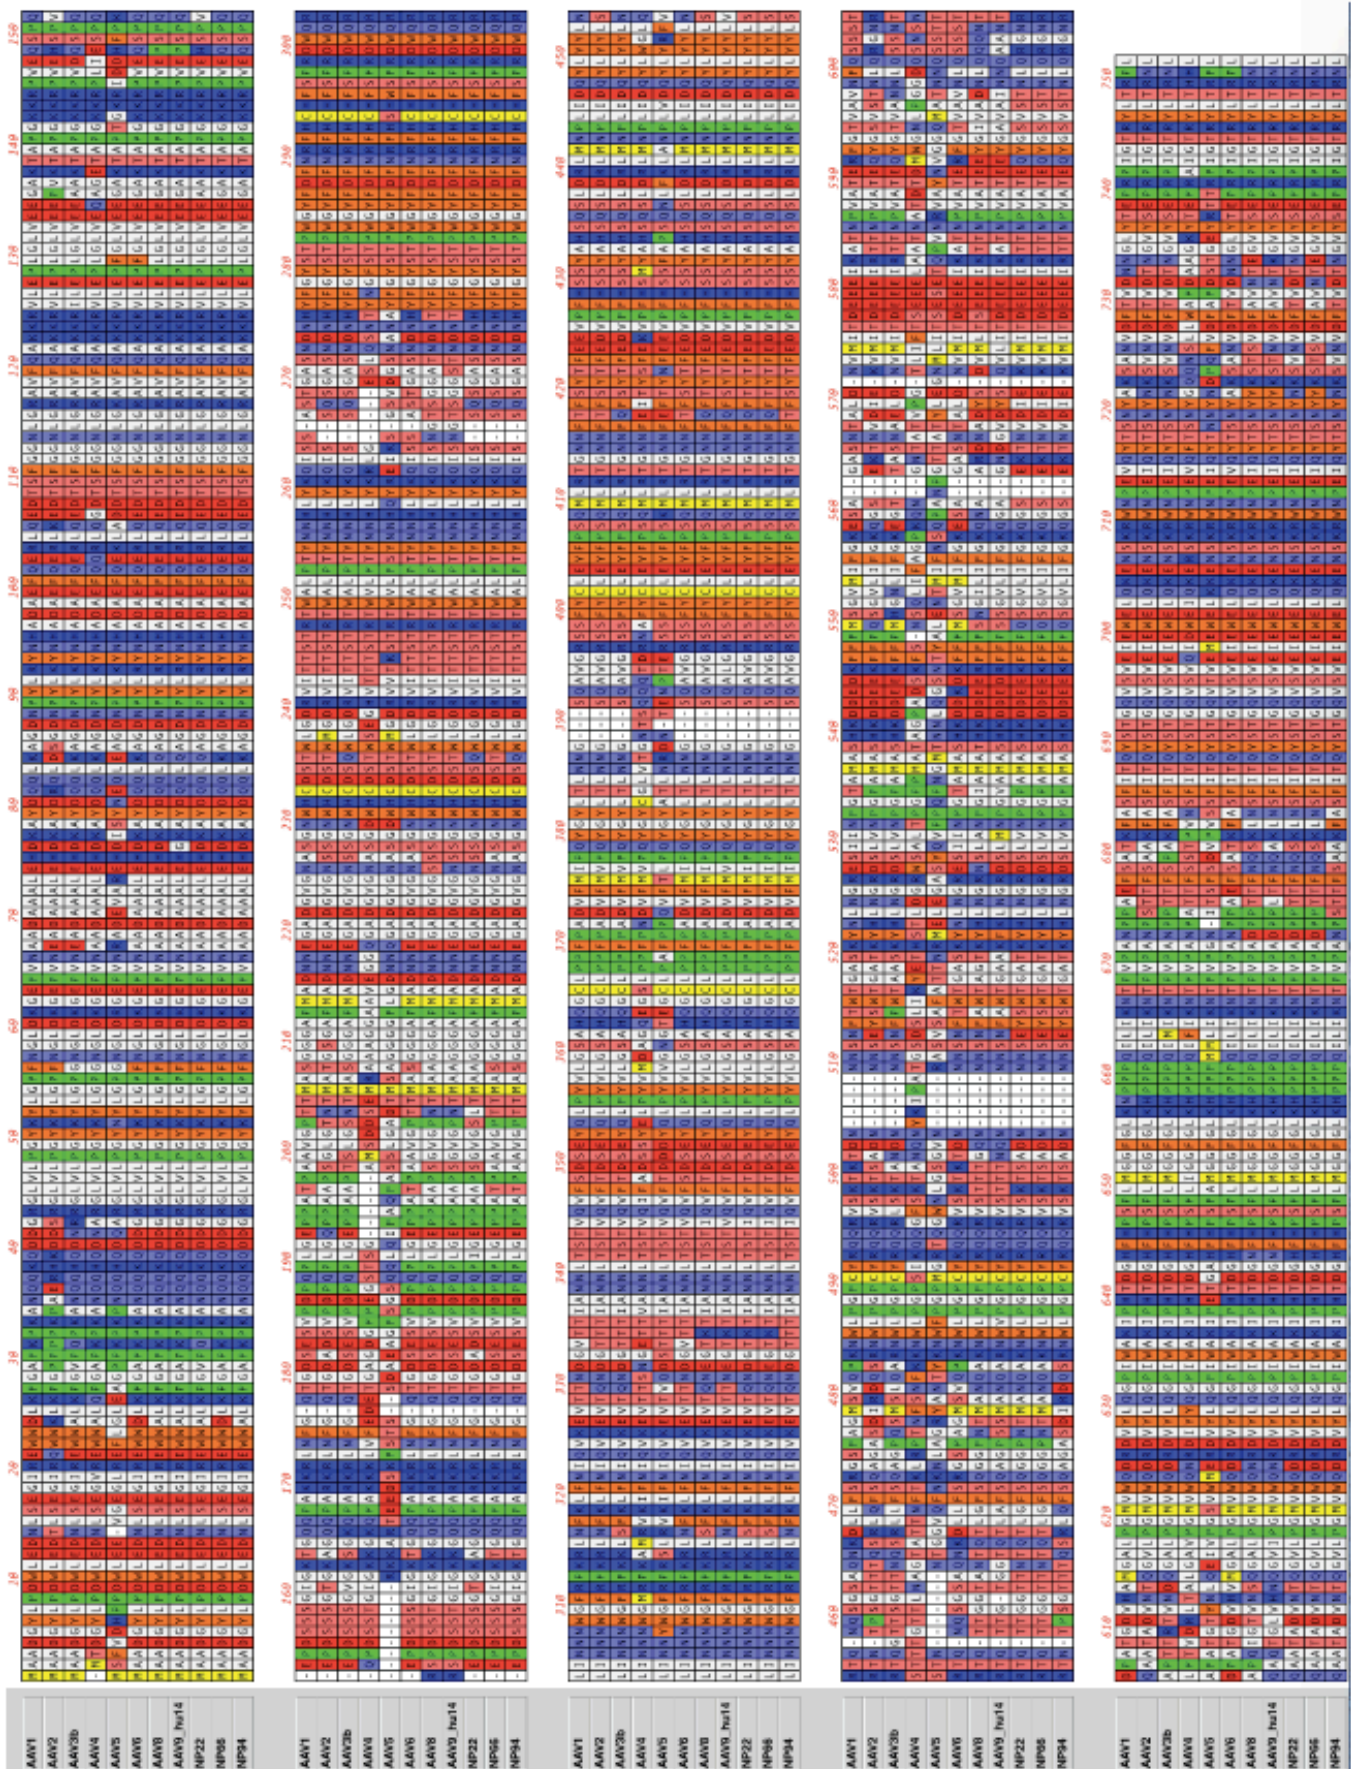

**Figure S5: Amino acid sequences of best performing shuffled capsid variants.**  
 Comparative amino acid sequence alignments of shuffled AAV variants to the parental serotypes.

## SUPPLEMENTAL TABLES

**Table S1: Details for normal off-clot human serum samples.** Details on 50 adult U.S. serum donors including date of sample blood draw (DOS), age at time of donation, sex, ethnicity, smoker status and ABO blood type. All donors were negative for HBV, HCV and HIV (data not shown).

| DOS     | Age | Sex    | Ethnicity | Smoke | ABO | DOS     | Age | Sex    | Ethnicity | Smoke | ABO |
|---------|-----|--------|-----------|-------|-----|---------|-----|--------|-----------|-------|-----|
| 1/29/16 | 34  | Male   | Black     | Yes   | B+  | 1/29/16 | 55  | Male   | Black     | Yes   | A+  |
| 2/8/16  | 23  | Female | Caucasian | Yes   | O+  | 1/29/16 | 22  | Male   | Black     | Yes   | O+  |
| 2/8/16  | 37  | Female | Black     | No    | A+  | 1/29/16 | 52  | Male   | Black     | Yes   | B+  |
| 2/8/16  | 21  | Female | Black     | No    | O+  | 1/29/16 | 22  | Male   | Black     | No    | A+  |
| 2/8/16  | 37  | Female | Caucasian | Yes   | A-  | 1/29/16 | 24  | Male   | Black     | Yes   | A+  |
| 2/8/16  | 24  | Female | Caucasian | No    | A-  | 2/5/16  | 18  | Female | Black     | Yes   | A+  |
| 1/29/16 | 21  | Male   | Black     | No    | O+  | 1/29/16 | 40  | Male   | Black     | No    | B+  |
| 1/29/16 | 23  | Male   | Black     | Yes   | O+  | 1/29/16 | 33  | Male   | Black     | Yes   | A+  |
| 1/29/16 | 25  | Female | Black     | Yes   | O+  | 1/12/16 | 42  | Male   | Black     | No    | B+  |
| 1/29/16 | 25  | Male   | Black     | Yes   | O+  | 1/29/16 | 22  | Male   | Black     | No    | O+  |
| 2/5/16  | 27  | Female | Black     | No    | A+  | 1/29/16 | 22  | Female | Black     | No    | A+  |
| 1/29/16 | 21  | Male   | Black     | Yes   | B+  | 1/29/16 | 41  | Male   | Caucasian | Yes   | A-  |
| 2/8/16  | 21  | Female | Black     | Yes   | O+  | 1/29/16 | 23  | Male   | Black     | Yes   | O+  |
| 1/29/16 | 20  | Male   | Black     | Yes   | O+  | 1/12/16 | 39  | Male   | Caucasian | Yes   | A-  |
| 1/12/16 | 31  | Male   | Black     | Yes   | A+  | 1/29/16 | 18  | Male   | Black     | No    | O+  |
| 1/29/16 | 29  | Male   | Black     | No    | B+  | 1/29/16 | 19  | Male   | Black     | Yes   | O+  |
| 1/29/16 | 42  | Male   | Black     | Yes   | A+  | 1/29/16 | 23  | Female | Black     | No    | O+  |
| 1/29/16 | 20  | Male   | Black     | Yes   | O+  | 1/29/16 | 18  | Female | Black     | No    | A+  |
| 1/29/16 | 39  | Female | Black     | Yes   | B+  | 1/29/16 | 42  | Male   | Black     | Yes   | A+  |
| 1/29/16 | 30  | Male   | Black     | Yes   | B+  | 1/29/16 | 24  | Male   | Black     | Yes   | O+  |
| 1/29/16 | 22  | Male   | Black     | Yes   | A+  | 1/29/16 | 53  | Male   | Black     | Yes   | A+  |
| 1/29/16 | 35  | Male   | Black     | Yes   | A+  | 1/12/16 | 24  | Male   | Black     | No    | B+  |
| 1/29/16 | 24  | Male   | Black     | No    | A+  | 1/29/16 | 59  | Female | Black     | Yes   | B+  |
| 2/5/16  | 18  | Female | Caucasian | No    | O+  | 1/29/16 | 22  | Female | Black     | Yes   | O+  |
| 2/5/16  | 36  | Female | Black     | No    | B+  | 1/29/16 | 43  | Male   | Black     | No    | A+  |





**Table S3: Different amino acids between evolved variants NP22, NP66 and NP94.**

AA = amino acid position with VP1 numbering. Orientation prediction is based on the available crystal structure residues for AAV8 (amino acid positions prior to 220 are uncharacterized in existing structures). Shaded boxes in gray highlight differences between the three capsid variants.

| AA position | Predicted orientation                | NP22 | NP66 | NP94 |
|-------------|--------------------------------------|------|------|------|
| 24          | n/a                                  | A    | D    | A    |
| 29          | n/a                                  | V    | A    | A    |
| 31          | n/a                                  | Q    | K    | K    |
| 84          | n/a                                  | Q    | K    | K    |
| 135         | n/a                                  | A    | G    | G    |
| 148         | n/a                                  | H    | Q    | Q    |
| 151         | n/a                                  | V    | Q    | Q    |
| 159         | n/a                                  | T    | I    | I    |
| 162         | n/a                                  | A    | T    | T    |
| 168         | n/a                                  | R    | K    | K    |
| 179         | n/a                                  | A    | S    | S    |
| 180         | n/a                                  | D    | E    | E    |
| 188         | n/a                                  | I    | L    | L    |
| 194         | n/a                                  | A    | T    | T    |
| 196         | n/a                                  | S    | A    | A    |
| 197         | n/a                                  | G    | A    | A    |
| 200         | n/a                                  | S    | P    | P    |
| 201         | n/a                                  | L    | T    | T    |
| 205         | n/a                                  | A    | S    | S    |
| 224         | Internal                             | S    | A    | A    |
| 233         | Internal                             | Q    | T    | Q    |
| 310         | Internal                             | K    | R    | R    |
| 312         | Internal                             | S    | N    | N    |
| 327         | External (top of cylinder)           | D    | E    | D    |
| 330         | External (base of cylinder)          | K    | K    | T    |
| 410         | Internal                             | Q    | Q    | T    |
| 412         | Internal                             | T    | T    | S    |
| 449         | External (base of 3-fold protrusion) | Q    | Q    | N    |
| 451         | Internal                             | T    | T    | P    |
| 452         | External (on 3-fold protrusion)      | G    | G    | S    |
| 456         | External (on 3-fold protrusion)      | N    | N    | T    |
| 457         | External (on 3-fold protrusion)      | T    | T    | Q    |
| 458         | External (on 3-fold protrusion)      | Q    | Q    | S    |
| 459         | External (on 3-fold protrusion)      | T    | T    | R    |
| 461         | External (on 3-fold protrusion)      | G    | G    | Q    |
| 465         | External (base of 3-fold protrusion) | G    | G    | A    |
| 467         | External (base of 3-fold protrusion) | P    | P    | A    |
| 468         | Internal                             | N    | N    | S    |
| 469         | External (base of 3-fold protrusion) | T    | T    | D    |
| 470         | External (base of 3-fold protrusion) | M    | M    | I    |
| 471         | External (base of 3-fold protrusion) | A    | A    | R    |
| 472         | External (base of 3-fold protrusion) | N    | N    | D    |
| 474         | External (base of 3-fold protrusion) | A    | A    | S    |
| 475         | External (base of 3-fold protrusion) | K    | K    | R    |
| 656         | Internal                             | D    | D    | N    |
| 658         | External (base of cylinder)          | P    | P    | S    |
| 662         | External (canyon)                    | N    | N    | S    |
| 663         | External (canyon)                    | Q    | Q    | A    |
| 664         | External (canyon)                    | S    | S    | A    |
| 666         | External (canyon)                    | L    | L    | F    |
| 667         | External (canyon)                    | N    | N    | A    |
| 705         | External (base of 3-fold protrusion) | N    | Y    | N    |
| 708         | External (base of 3-fold protrusion) | V    | T    | V    |
| 709         | External (on 3-fold protrusion)      | N    | S    | N    |
| 713         | External (base of 3-fold protrusion) | T    | A    | T    |
| 715         | External (canyon)                    | D    | N    | D    |
